# Supplementary material
Source: PubMed Central journal article supplement (PMC2776295)
Supplement: mmc1.pdf [file mmc1.pdf]

Biophysical Journal, Volume 97

**Supporting Material**

**Effectiveness of Hair Bundle Motility as the Cochlear Amplifier**

Bora Sul and Kuni H. Iwasa

## Supplementary Material

The range of the transition rates examined for optimizing  $\Phi$

| Parameter    | Range               |
|--------------|---------------------|
| $k_1/\omega$ | $10^{-5} - 10^{11}$ |
| $k_2/\omega$ | $10^{-5} - 10^5$    |
| $k_3/\omega$ | $10^{-5} - 10^{11}$ |
| $k_4/\omega$ | $10^{-5} - 10^5$    |
| $r_3$        | 0.0005 — 100        |
| $r_4$        | 0.0005 — 100        |

Table : The parameter  $r_2$  is determined from these parameters and the ratio  $[\text{Ca}]_{out}/[\text{Ca}]_{in}$ , which is  $\sim 100$  for the mammalian ear and  $\sim 1000$  for the avian ear (see text).
